# Supplementary material
Source: HighWire-hosted journal article supplement (https://www.cmaj.ca/highwire/filestream/68866/field_highwire_adjunct_files/0/170671-image-1-at.pdf)
Supplement: 170671-image-1-at.pdf [file 170671-image-1-at.pdf]

**Appendix 1: Axial  $T_1$ -weighted magnetic resonance imaging showing enhancing, rope-like tissue extending from the orbital apex toward the cavernous sinus**

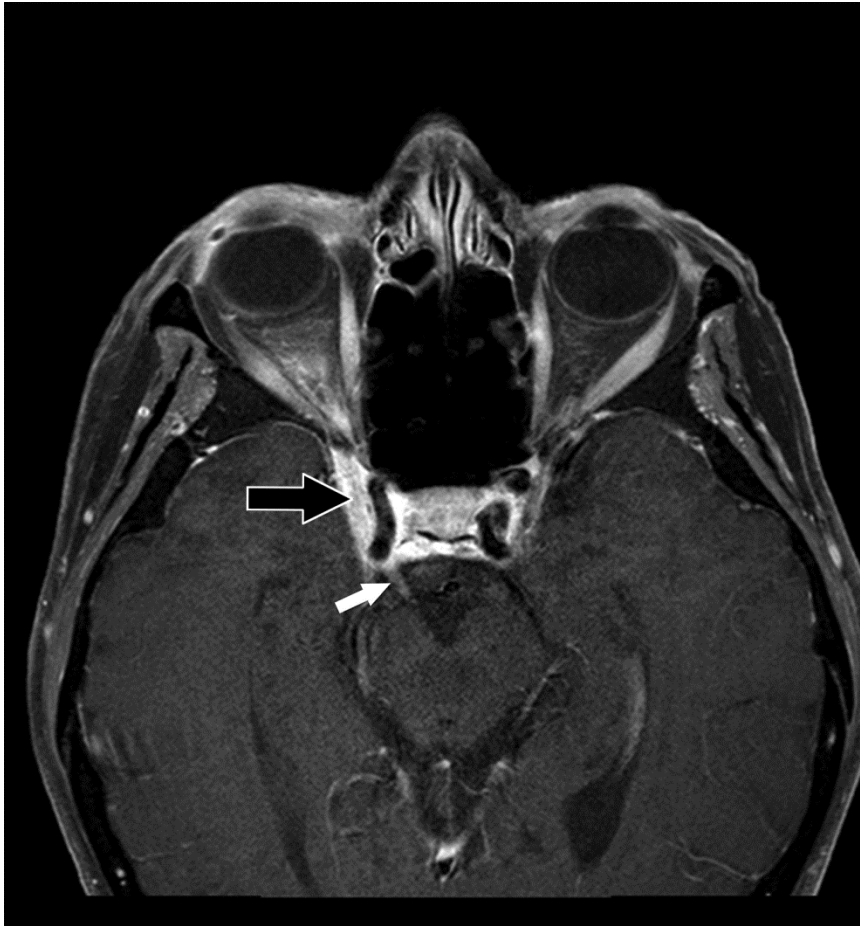

Axial view of  $T_1$ -weighted magnetic resonance imaging with gadolinium (fat saturated) at the level of the right orbital apex demonstrating the rope-like enhancing tissue extending toward the right cavernous sinus (black arrow). More caudally, there is enhancement of the right oculomotor nerve (white arrow).
